# Supplementary material
Source: PubMed Central journal article supplement (PMC3230708)

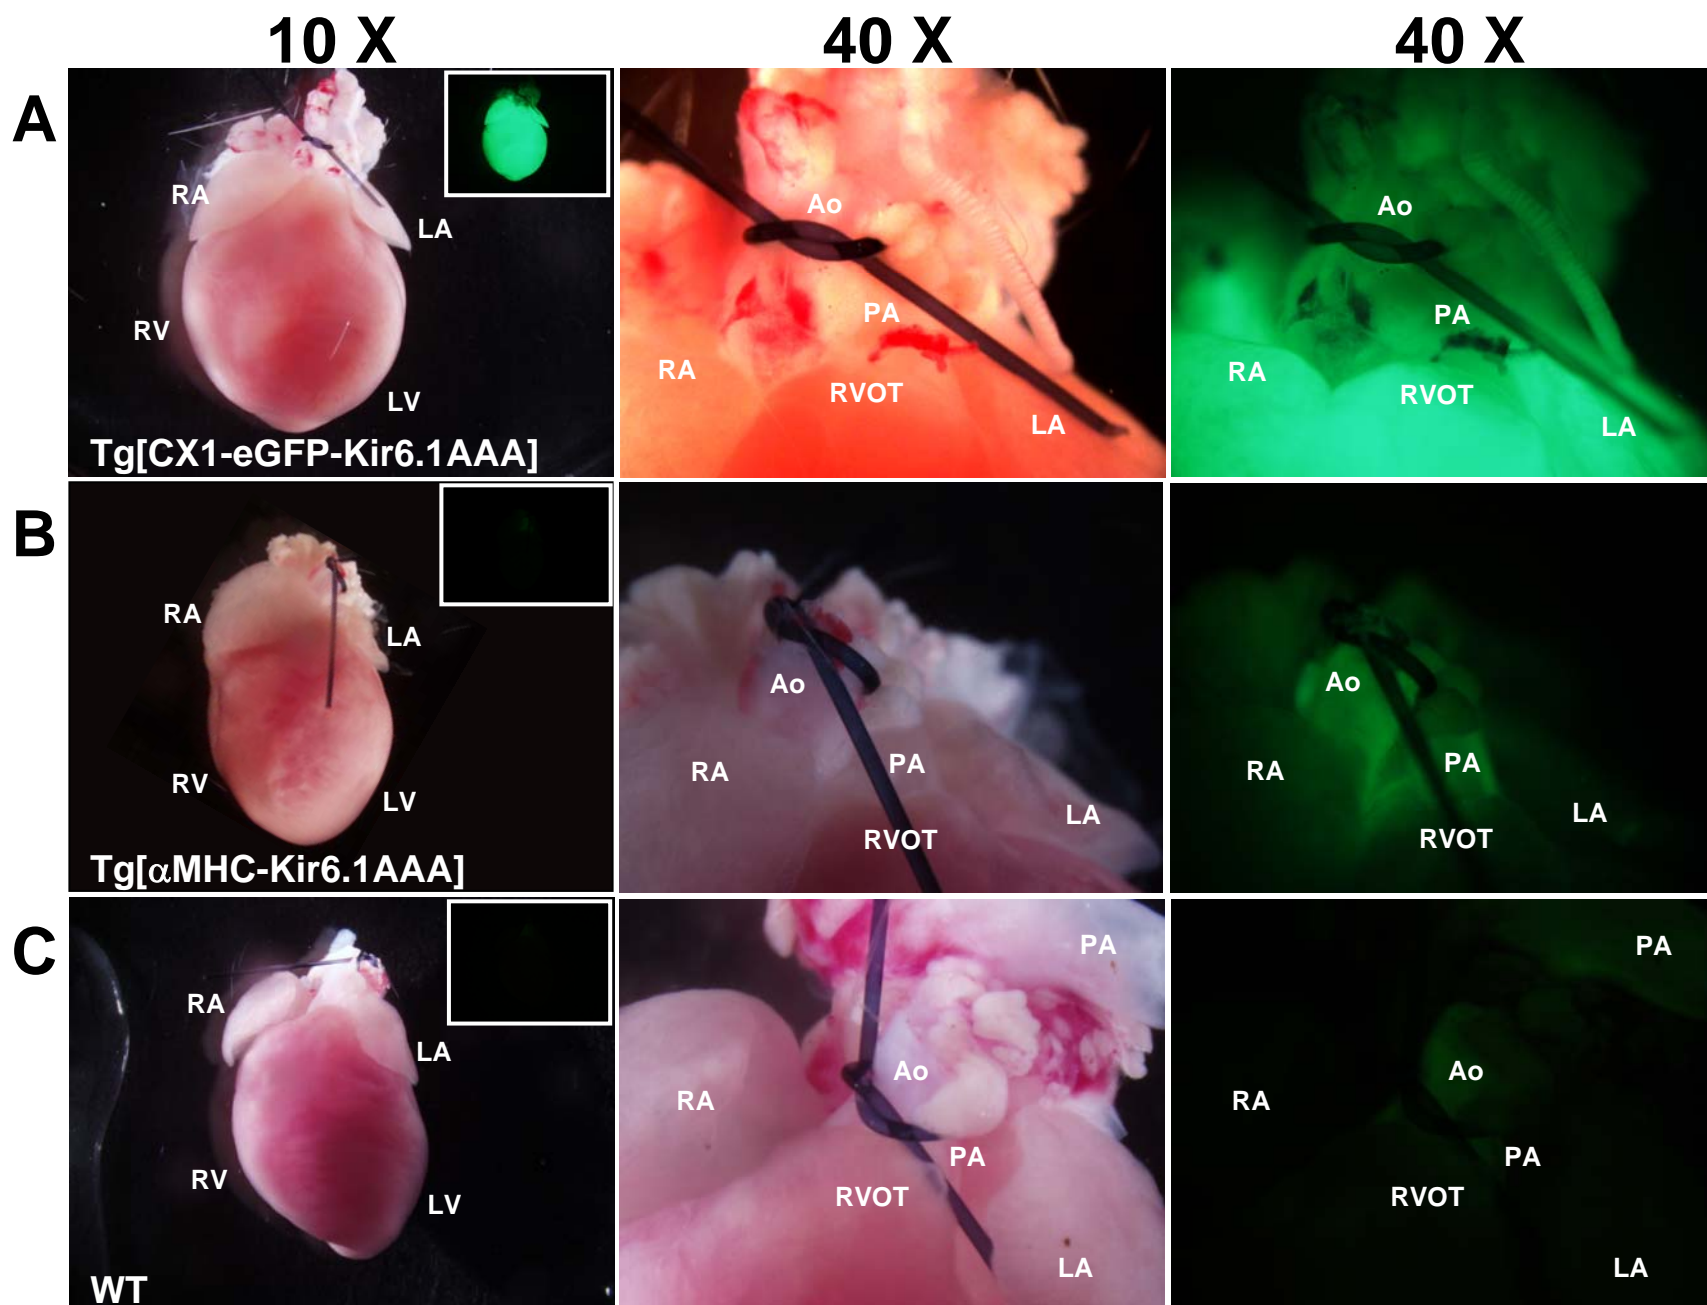

**Figure S1**

Supplement: NIHMS336516-supplement-01.pdf [file NIHMS336516-supplement-01.pdf]
